# Supplementary material
Source: publisher figshare collection journal article supplement (https://tandf.figshare.com/articles/dataset/_/12258488)
Supplement: Supplementary file 1 [file 1]

Archive with 3 entries (3 files):
- README.txt
- Rec_codes.zip
- Rec_proofs.pdf
