# Supplementary material
Source: publisher figshare collection journal article supplement (https://tandf.figshare.com/articles/dataset/_/12258488)
Supplement: Supplementary file 1 [file 1 › README.txt]

Rec_proofs: This is a pdf file providing all proofs in the article.

Rec_codes: This is a zip file containing Matlab codes to perform the reconstruction approach for the real data in Section 5.3. 
